# Supplementary material
Source: Springer Nature journal article supplement (https://www.springermedizin.de/resource/supplementary/12245_2013_167_MOESM1_ESM.pdf/9672948)

Gantry: 0°  
Time: 1825 ms  
Slice: 2 mm  
Couch: -30.378906  
Pos: HFS

C: 500.0, W: 2000.0  
Bone 7/13

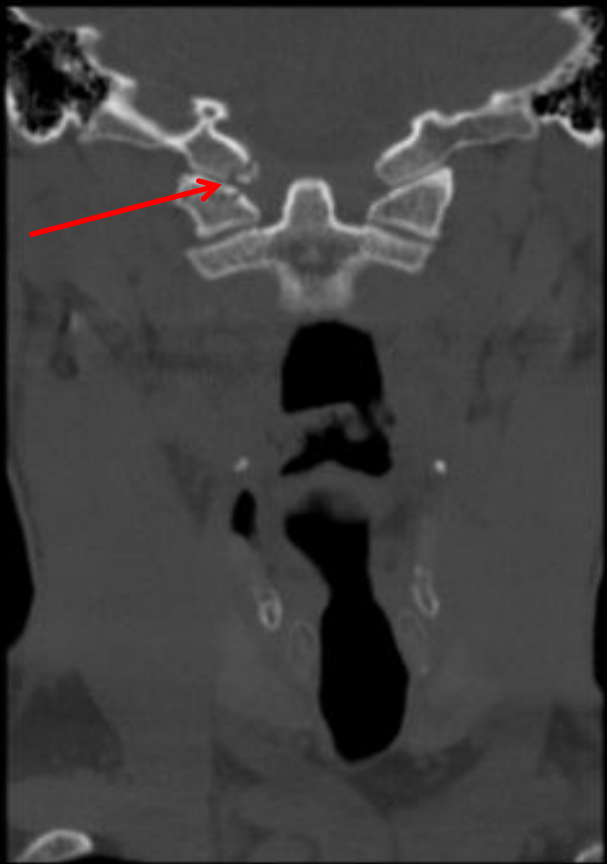

F: BONE  
140 kV  
Image no: 18  
Image 18 of 63  
6/4/2010, 2:40:57 PM

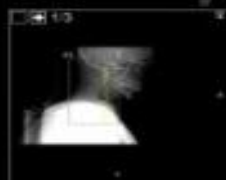

F

Supplement: MOESM1 [file 9672948]
